# Supplementary material
Source: PubMed Central journal article supplement (PMC9186297)

**1b**  $\alpha$ -Flag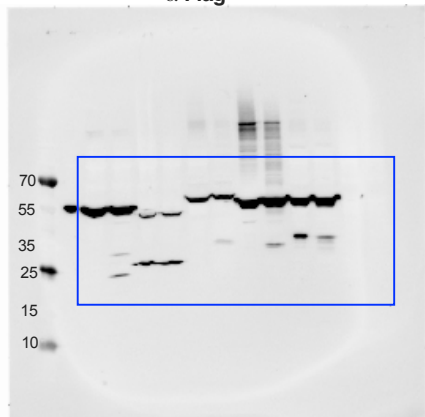**1c** protein stain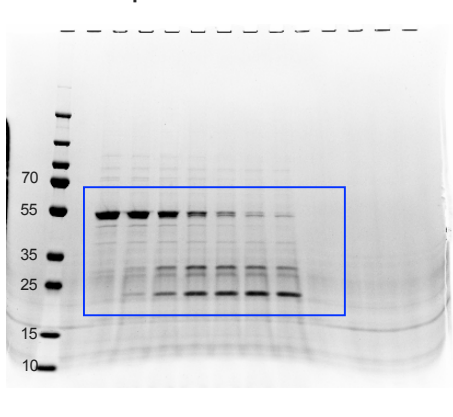**1d** protein stain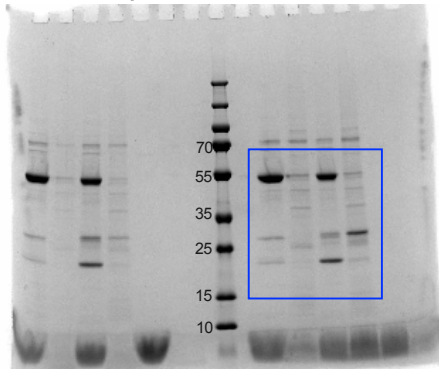**1g** protein stain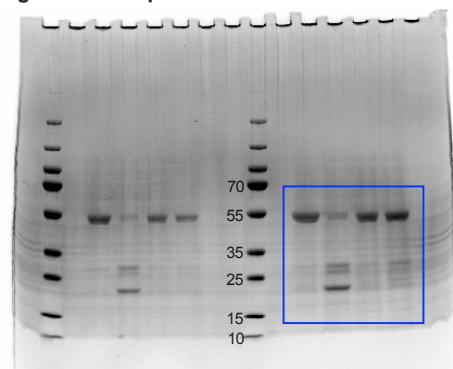**3a**  $\alpha$ -GSDMA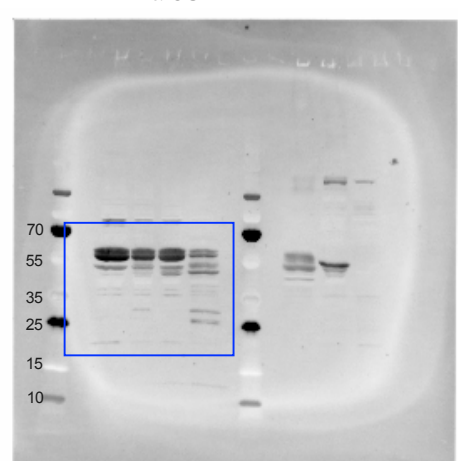 $\alpha$ -actin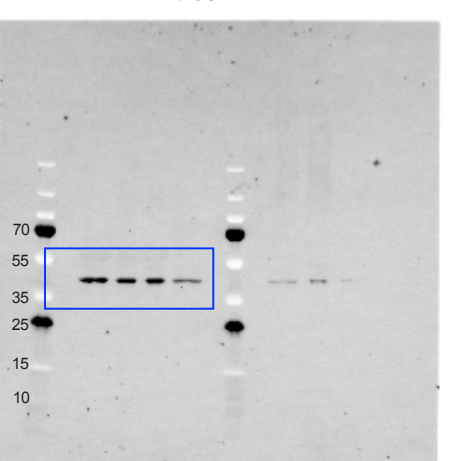**2b**  $\alpha$ -Flag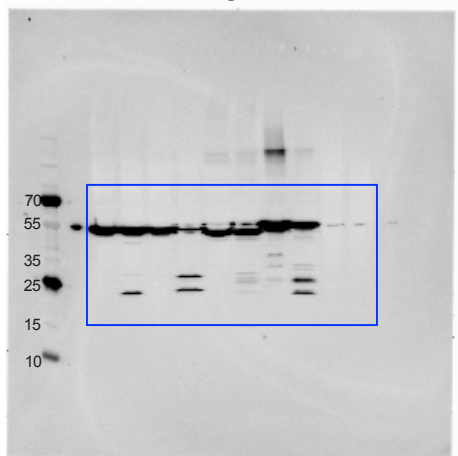**3f**  $\alpha$ -GSDMA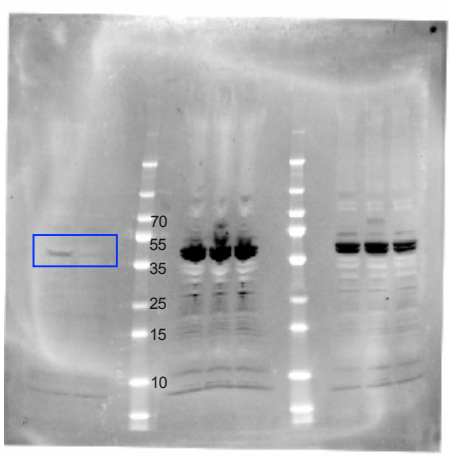

Supplement: NIHMS1801154-supplement-1801154_Sup_Fig_1.pdf [file NIHMS1801154-supplement-1801154_Sup_Fig_1.pdf]
