# Supplementary material
Source: PubMed Central journal article supplement (PMC9186297)
Supplement: NIHMS1801154-supplement-1801154_Sup_Table_1.pdf [file NIHMS1801154-supplement-1801154_Sup_Table_1.pdf]

| Supplementary Table 1   Primers for cloning |                                                       |
|---------------------------------------------|-------------------------------------------------------|
| Primer                                      | Sequence (5' → 3')                                    |
| pETSUMO C                                   | ACCACCAATCTGTTCTCTGTGAG                               |
| pETSUMO D                                   | AGACAAGCTTAGGTATTTATTCGGCG                            |
| pETSUMO GSDMA A                             | CTCACAGAGAACAGATTGGTGGTATGACCATGTTTGAAAATGTCACCCG     |
| pETSUMO GSDMA B                             | CGCCGAATAAATACCTAAGCTTGCTTTAGGAGGCCTTGGTAAAGCTGC      |
| pCMV-Flag C                                 | TGCGGCCGCAAGCTT                                       |
| pCMV-Flag D                                 | TCTAGAGGATCCCGGGTGG                                   |
| pCMV-Flag-hGSDMA A                          | AAGCTTGCGGCCGCAATGACCATGTTTGAAAATGTCACCC              |
| pCMV-Flag-hGSDMA B                          | CCACCCGGGATCCTCTAGATTAGGAGGCCTTGGTAAAGCTG             |
| pCMV-Flag-hGSDMB A                          | AAGCTTGCGGCCGCAATGTTTCAGCGTATTTGAGGAAAATCACAAG        |
| pCMV-Flag-hGSDMB B                          | CCACCCGGGATCCTCTAGATTAGGAAGAGACAGAGGTAGGCC            |
| pCMV-Flag-hGSDMC A                          | AAGCTTGCGGCCGCAATGCCCTCCATGTTGGAACG                   |
| pCMV-Flag-hGSDMC B                          | CCACCCGGGATCCTCTAGATTAGGCCTCAGCCAGCTGC                |
| pCMV-Flag-hGSDMD A                          | AAGCTTGCGGCCGCAATGGGGTCGGCCTTTGAG                     |
| pCMV-Flag-hGSDMD B                          | CCACCCGGGATCCTCTAGACTAGTGGGGCTCCTGGCT                 |
| pCMV-Flag-hGSDME A                          | AAGCTTGCGGCCGCAATGTTTGCCAAAGCAACCAGGAATTTTC           |
| pCMV-Flag-hGSDME B                          | CCACCCGGGATCCTCTAGATCATGAATGTTCTCTGCCTAAAGCACAG       |
| pCMV-Flag-mGSDMA1 A                         | AAGCTTGCGGCCGCAATGACTATGTTTGAGAATGTCACCCG             |
| pCMV-Flag-mGSDMA1 B                         | CCACCCGGGATCCTCTAGATTAGGAATTTCTTGCTTAGCAGTTGAAGG      |
| pCMV-Flag-mGSDMA2 A                         | AAGCTTGCGGCCGCAATGTCTATGTTTGAGGATGTCACCC              |
| pCMV-Flag-mGSDMA2 B                         | CCACCCGGGATCCTCTAGATTAGGAATCCCTGCTTAGCAGG             |
| pCMV-Flag-mGSDMA3 A                         | AAGCTTGCGGCCGCAATGCCTGTGTTTGAGGATGTCAC                |
| pCMV-Flag-mGSDMA3 B                         | CCACCCGGGATCCTCTAGATTAAGATAGAGCACAAATAAGTAAGTGCATTAGA |
| hGSDMA_Δ240-247 F                           | GGAGAGTCTGATGTTGGGGACGTACA                            |
| hGSDMA_Δ240-247 R                           | ATCAGACTCTCCTGACTTTTCTCCAGG                           |
